# Supplementary material for: Identification of Ms2, a Novel Locus Controlling Male-fertility Restoration of Cytoplasmic Male-sterility in Onion (Allium Cepa L.), and Development of Tightly Linked Molecular Markers
Source: Research Square preprint supplement (doi:10.21203/rs.3.rs-643567/v1), 2021-06-29
Supplement: Supplementary file 1 [file 2c89be4b3f33273406eb8c4d.xlsx]

## Sheet: Supplementary Table 5
Supplementary Table 5. Summary of read mapping to the transcriptomes.
Item	Transcriptome
	Reference						De novo assemblyb						Draft reference transcripts (DRTs) ver 1.0
	First analysis		Second analysis		Third analysis		First analysis		Second analysis		Third analysis		Second analysis		Third analysis
	MF	MS	MF	MS	MF	MS	MF	MS	MF	MS	MF	MS	MF	MS	MF	MS
Number of trimmed reads	38087818	36101862	34518600	41059158	53010888	44044480	38087818	36101862	34518600	41059158	53010888	44044480	34518600	41059158	53010888	44044480
Number of mapped reads	28984898	29576222	28477710	32729948	41961750	35859512	16336818	14817718	13179654	15856644	19622118	16940122	24877524	27754500	35983930	30809336
Percentage of mapped reads	0.761	0.8192	0.825	0.7971	0.7916	0.8142	0.4289	0.4104	0.3818	0.3862	0.3702	0.3846	0.7207	0.676	0.6788	0.6995
Number of expressed contigsa	154264	155649	151995	159418	158510	157616	37641	37040	37638	37644	37643	37644	35483	35496	35499	35491
Percentage of expressed contigs	0.9339	0.9423	0.9202	0.9651	0.9596	0.9542	0.9999	0.984	0.9998	1	1	1	0.9994	0.9997	0.9998	0.9996
aThe number of contigs containing at least one read count.
bPooled trimmed reads not mapped to the reference transcriptome in first, second, and third analyses were de novo assembled.
