# Supplementary material for: Identification of Ms2, a Novel Locus Controlling Male-fertility Restoration of Cytoplasmic Male-sterility in Onion (Allium Cepa L.), and Development of Tightly Linked Molecular Markers
Source: Research Square preprint supplement (doi:10.21203/rs.3.rs-643567/v1), 2021-06-29
Supplement: Supplementary file 2 [file d5275e03332fd5d862cbf09f.xlsx]

## Sheet: Supplementary Table 3
Supplementary Table 3. Summary of sequencing data produced from RNA-Seq analyses of bulked samples of male-fertile and male-sterile onions.
Item	RNA-Seq analysis
	First analysis		Second analysis		Third analysis
Bulked RNAs	Male-fertile	Male-sterile	Male-fertile	Male-sterile	Male-fertile	Male-sterile
Number of raw reads	40474140	38070316	36356296	43294058	59583448	49602098
Length of raw reads (bp)	6111595140	5748617716	5489800696	6537402758	8997100648	7489916798
SRA accession number	SRR13787369	SRR13787368	SRR13787367	SRR13787366	SRR13787365	SRR13787364
Number of trimmed reads	38087818	36101862	34518600	41059156	53010888	44044480
Length of trimmed reads (bp)	5523831268	5203188722	5023065767	5971685781	7711367861	6385460269
