# Supplementary material for: Identification of Ms2, a Novel Locus Controlling Male-fertility Restoration of Cytoplasmic Male-sterility in Onion (Allium Cepa L.), and Development of Tightly Linked Molecular Markers
Source: Research Square preprint supplement (doi:10.21203/rs.3.rs-643567/v1), 2021-06-29
Supplement: Supplementary file 3 [file e486e380ab3951012d9f857f.docx]

**Supplementary Table 7.** List of contigs containing homozygous SNPs between bulked RNAs and showing high homology with those mapped in two onion linkage maps

| Screened contig | Identical or homologous  contig | Position  (Ch / cM) | Reference |
| --- | --- | --- | --- |
| AC.Combine.Locus_14688.6 | Identical | 2 / 0.0 | Cho et al. (2021) |
| AC.Combine.Locus_104.1 | isotig35596 | 2 / 14.9 | Duangjit et al. (2013) |
| AC.Combine.Locus_49504.2 | isotig29784 | 2 / 11.0 |
| AC.Combine.Locus_66080.1 | isotig29531 | 6B / 35.2 |
| AC.Combine.Locus_76285.1 | isotig41662 | 2 / 39.7 |
| AC.Combine.Locus_6342.1 | isotig33144 | 2 / 11.0 |
